# Supplementary material
Source: PubMed Central journal article supplement (PMC5963837)
Supplement: joces-131-206789-s1.pdf [file joces-131-206789-s1.pdf]

## PHOSPHORYLATION HOTSPOT IN THE C-TERMINAL DOMAIN OF OCCLUDIN REGULATES THE DYNAMICS OF EPITHELIAL JUNCTIONAL COMPLEXES

**Bhargavi Manda, Hina Mir, Ruchika Gangwar, Avtar S. Meena, Shrunali Amin,  
Pradeep K. Shukla, Kesha Dalal, Takuya Suzuki and RadhaKrishna Rao**

### **List of materials included**

Supplemental figures S1 through S8  
Table S1

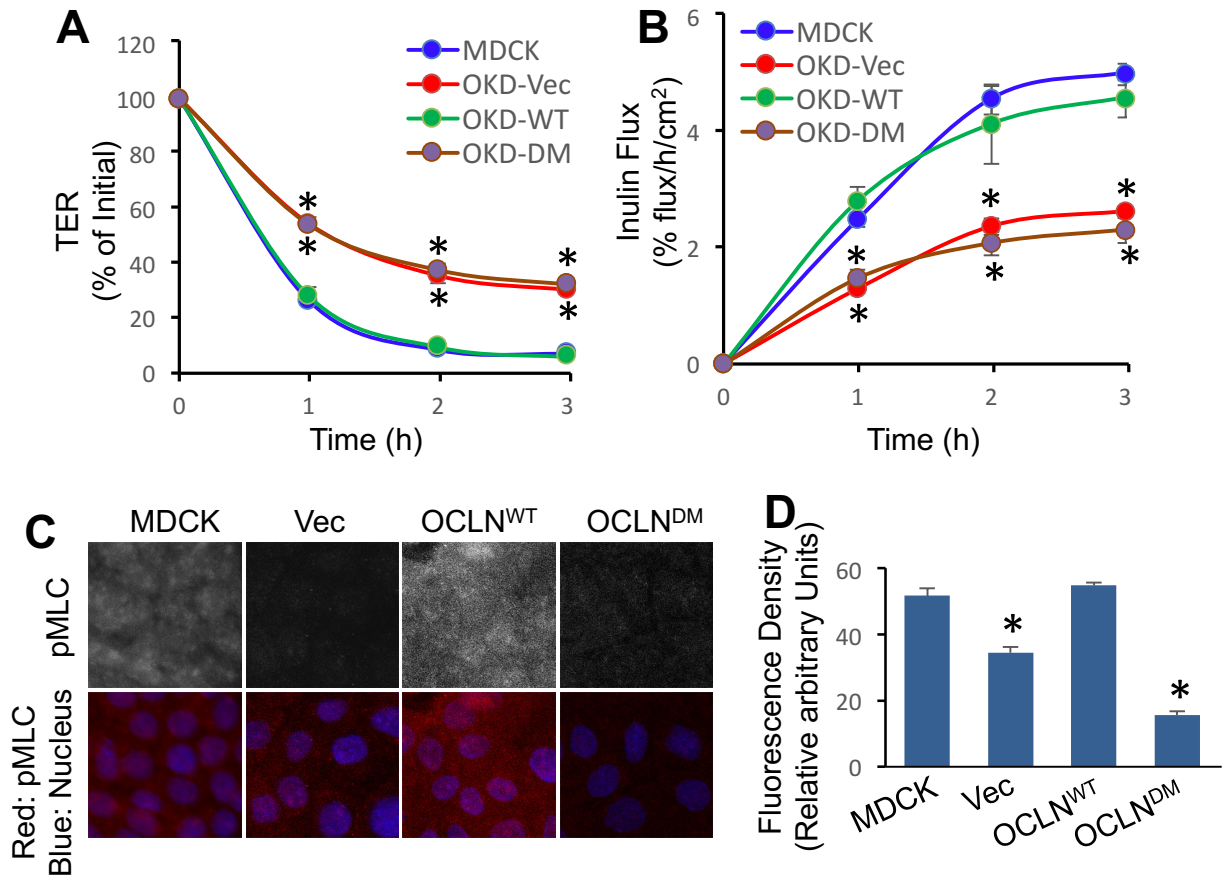

**Figure S1: Effect of ORM deletion on actin cytoskeleton.** **A & B:** MDCK (Blue), OLCN<sup>VEC</sup> (OKD-Vec; Red), OLCN<sup>WT</sup> (OKD-WT; Green) and OLCN<sup>DM</sup> (OKD-DM; Brown) cell monolayers in transwell inserts were incubated with latrunculin A (100 nM). At varying times TER (A) and FITC-inulin flux (B) were measured. Values are mean  $\pm$  SEM (n = 3). Asterisks indicate the Vec and DM values are significantly (P<0.05) different from corresponding values for MDCK and WT cell monolayers. **C & D:** MDCK, OLCN<sup>VEC</sup>, OLCN<sup>WT</sup> and OLCN<sup>DM</sup> cell monolayers in transwell inserts were fixed and stained for pMLC (Red) and nucleus (Blue) (C). Fluorescence in 6 different regions of monolayers were measured (D) and values presented as mean  $\pm$  SEM. This was repeated once with similar results. Asterisks indicate the values that are significantly (P<0.05) different from corresponding values for MDCK and WT cell monolayers.

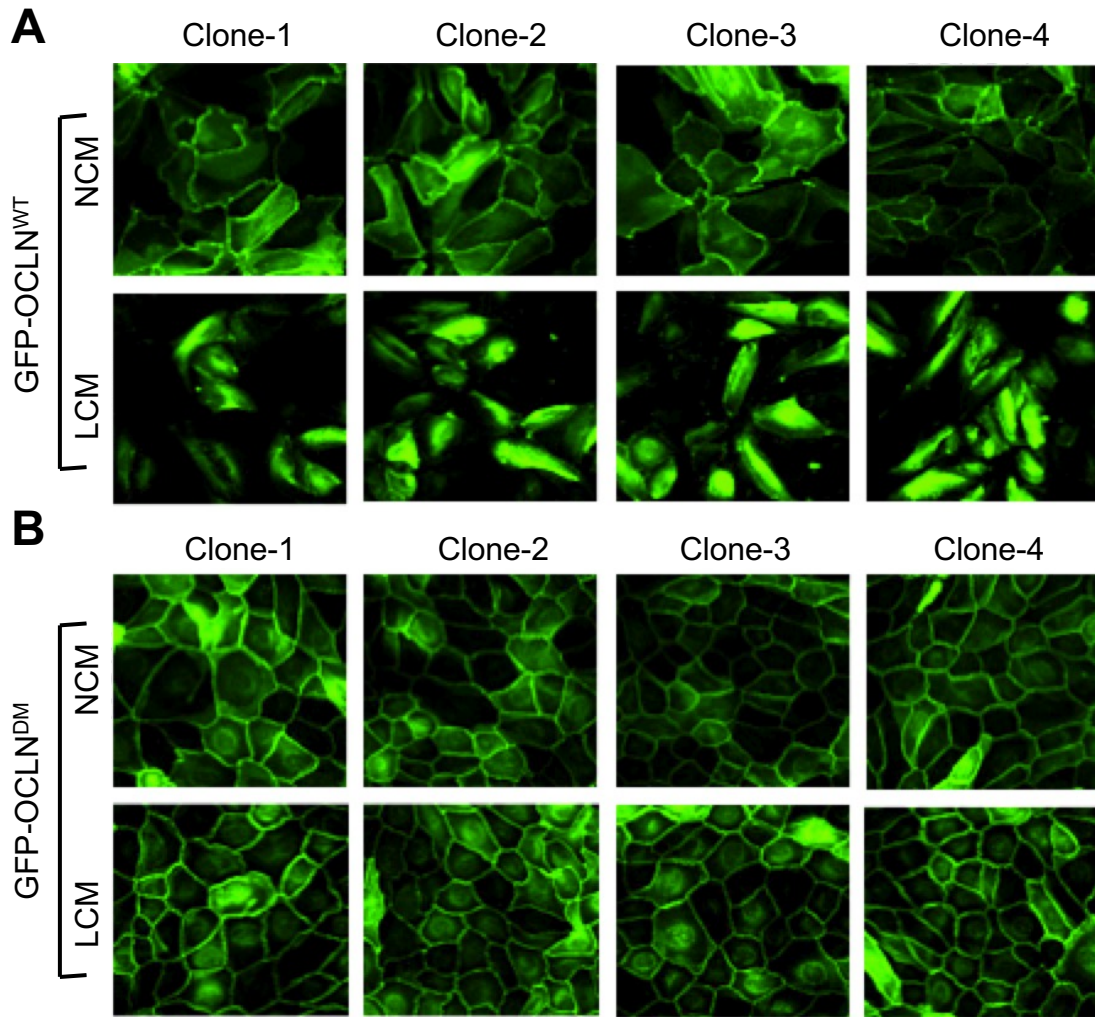

**Figure S2: ORM deletion attenuates Ca<sup>2+</sup> depletion-mediated disassembly of occludin from the TJ.** OCLN<sup>WT</sup> (A) and OCLN<sup>DM</sup> (B) cell monolayers from different clones were incubated with low calcium medium (LCM) or normal calcium medium (NCM) for 16 hr. Live-cell images for EGFP fluorescence were captured before and after incubation.

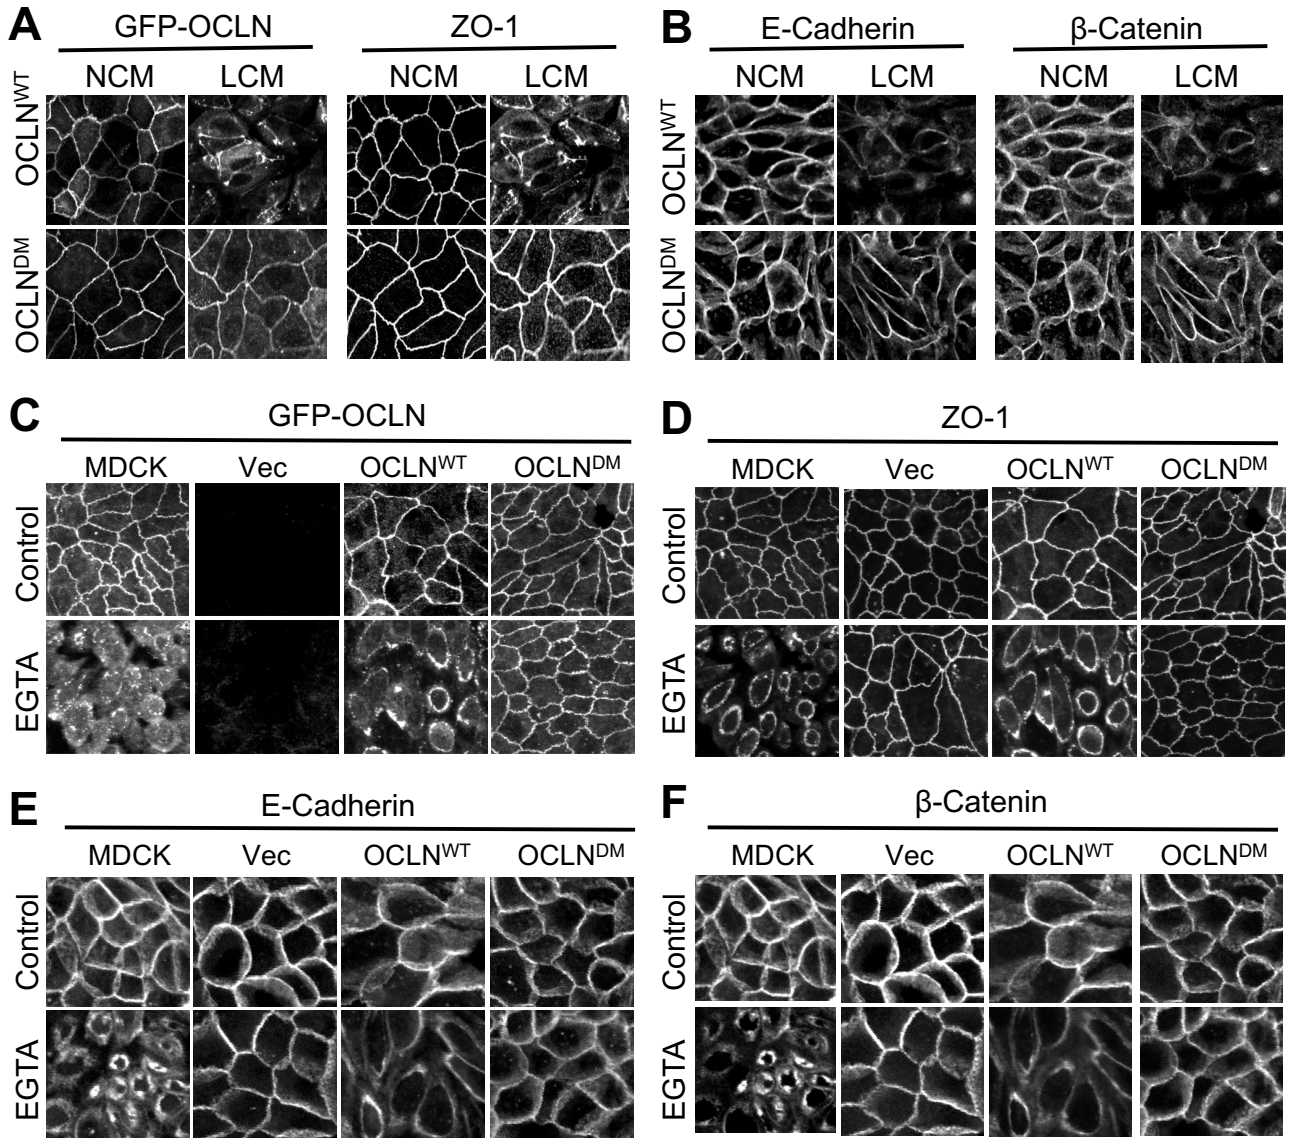

**Figure S3: Deletion of ORM attenuates Ca<sup>2+</sup> depletion-induced redistribution of TJ and AJ proteins.** **A & B:** OCLN<sup>WT</sup> and OCLN<sup>DM</sup> cell monolayers were incubated with low Ca<sup>2+</sup> medium (LCM) or normal Ca<sup>2+</sup> medium (NCM) for 16 hr. Fixed cell monolayers were stained for EGFP-occludin/ZO-1 (A) and E-cadherin/ $\beta$ -Catenin (B). **C-F:** MDCK, Vec, OCLN<sup>WT</sup> and OCLN<sup>DM</sup> cell monolayers were incubated with or without 4 mM EGTA. Cell monolayers fixed at 0, 5 and 30 min of EGTA treatment were stained for EGFP-occludin (C), ZO-1 (D), E-cadherin (E) and  $\beta$ -catenin (F).

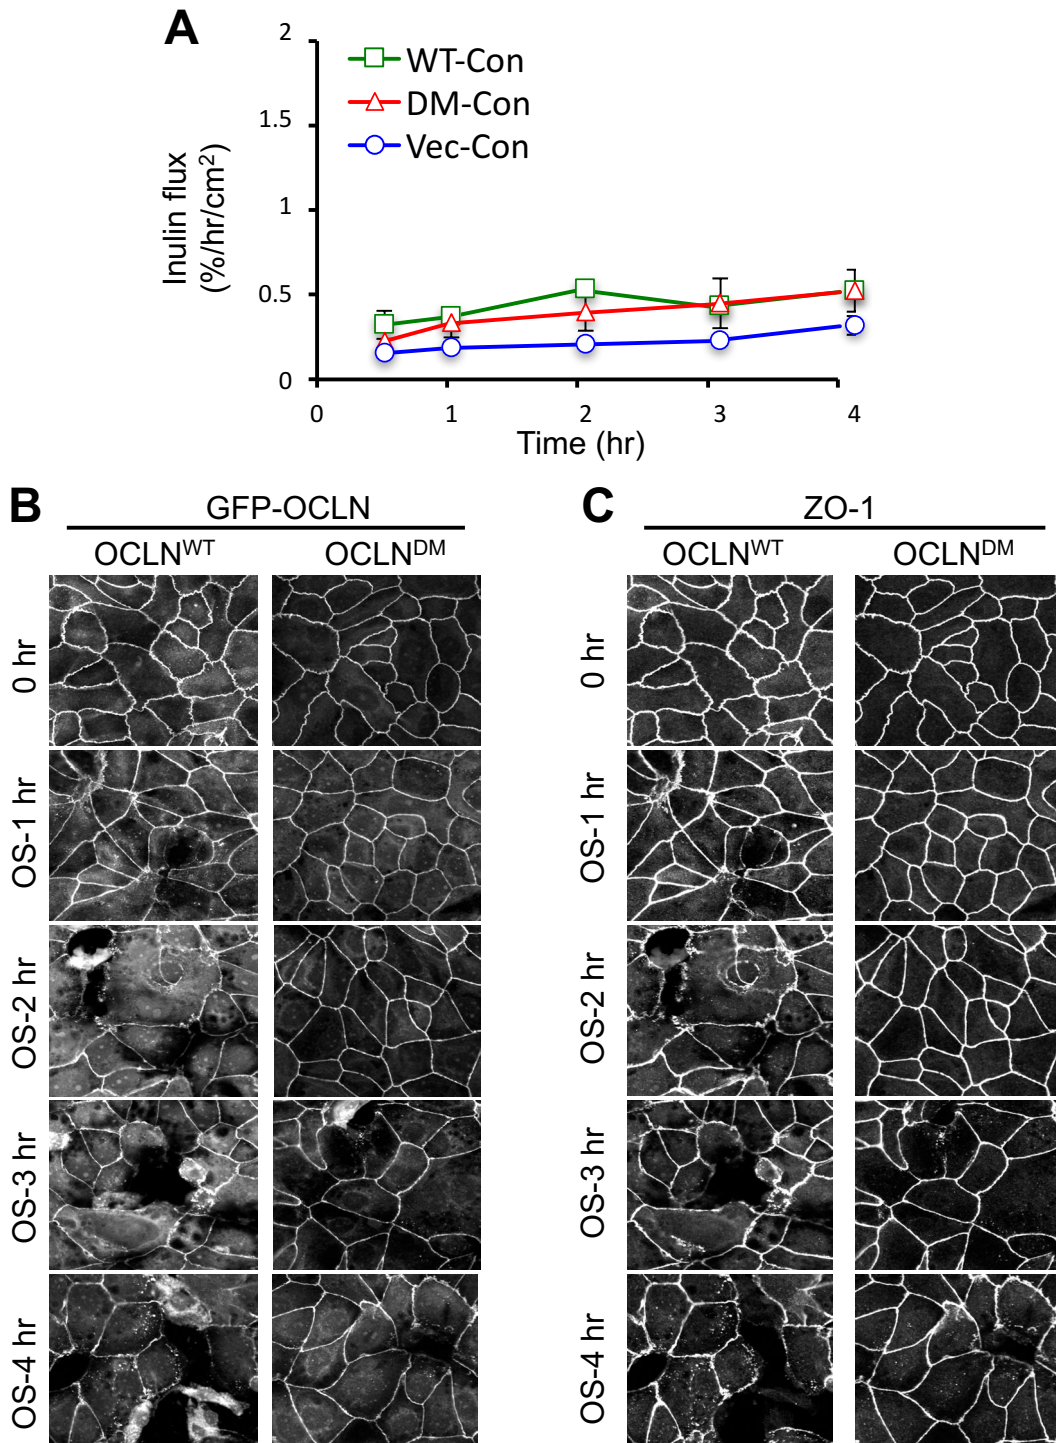

**Fig S4: Deletion of ORM attenuates osmotic stress-induced redistribution of TJ proteins.** OCLN<sup>WT</sup>, OCLN<sup>DM</sup> and Vec cell monolayers were grown in transwell inserts and inulin flux (A) was measured for 4 hr. These data represent the control values for data in Fig. 4A. **B & C:** Following osmotic stress for varying times, cell monolayers were fixed and stained for EGFP-occludin (B) and ZO-1 (C); these images represent the individual images corresponding to those in Fig. 4B.

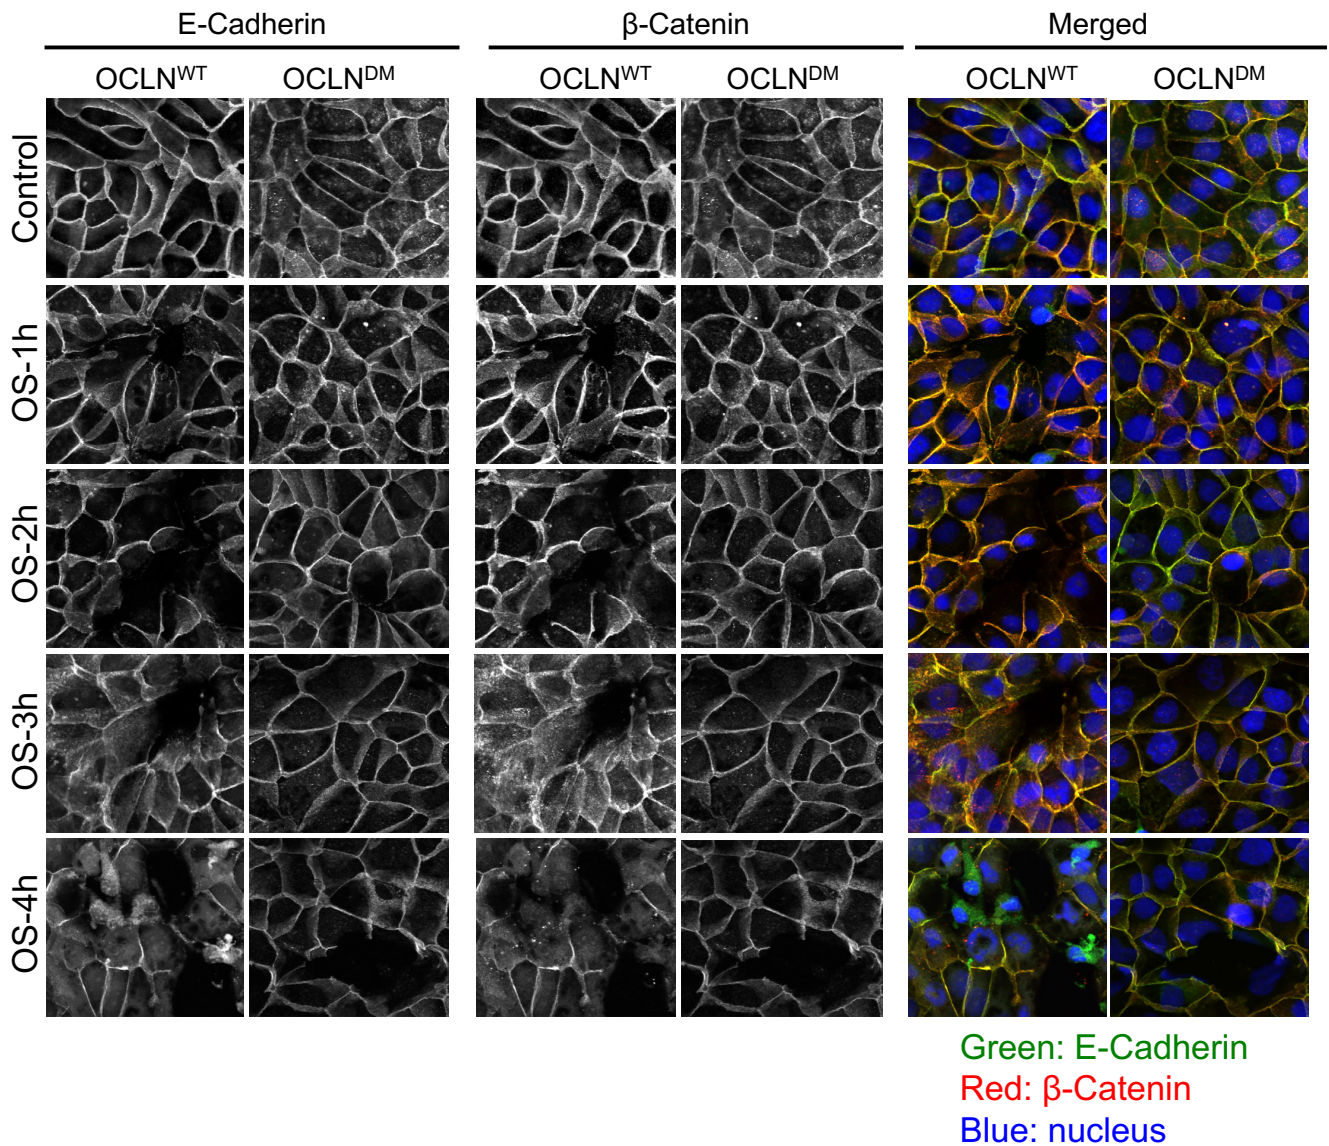

**Fig S5: Deletion of ORM attenuates osmotic stress-induced redistribution of AJ proteins.** OCLN<sup>WT</sup>, OCLN<sup>DM</sup> and Vec cell monolayers on transwell inserts were exposed to osmotic stress for varying times. Fixed cell monolayers were co-stained for E-cadherin and  $\beta$ -catenin.

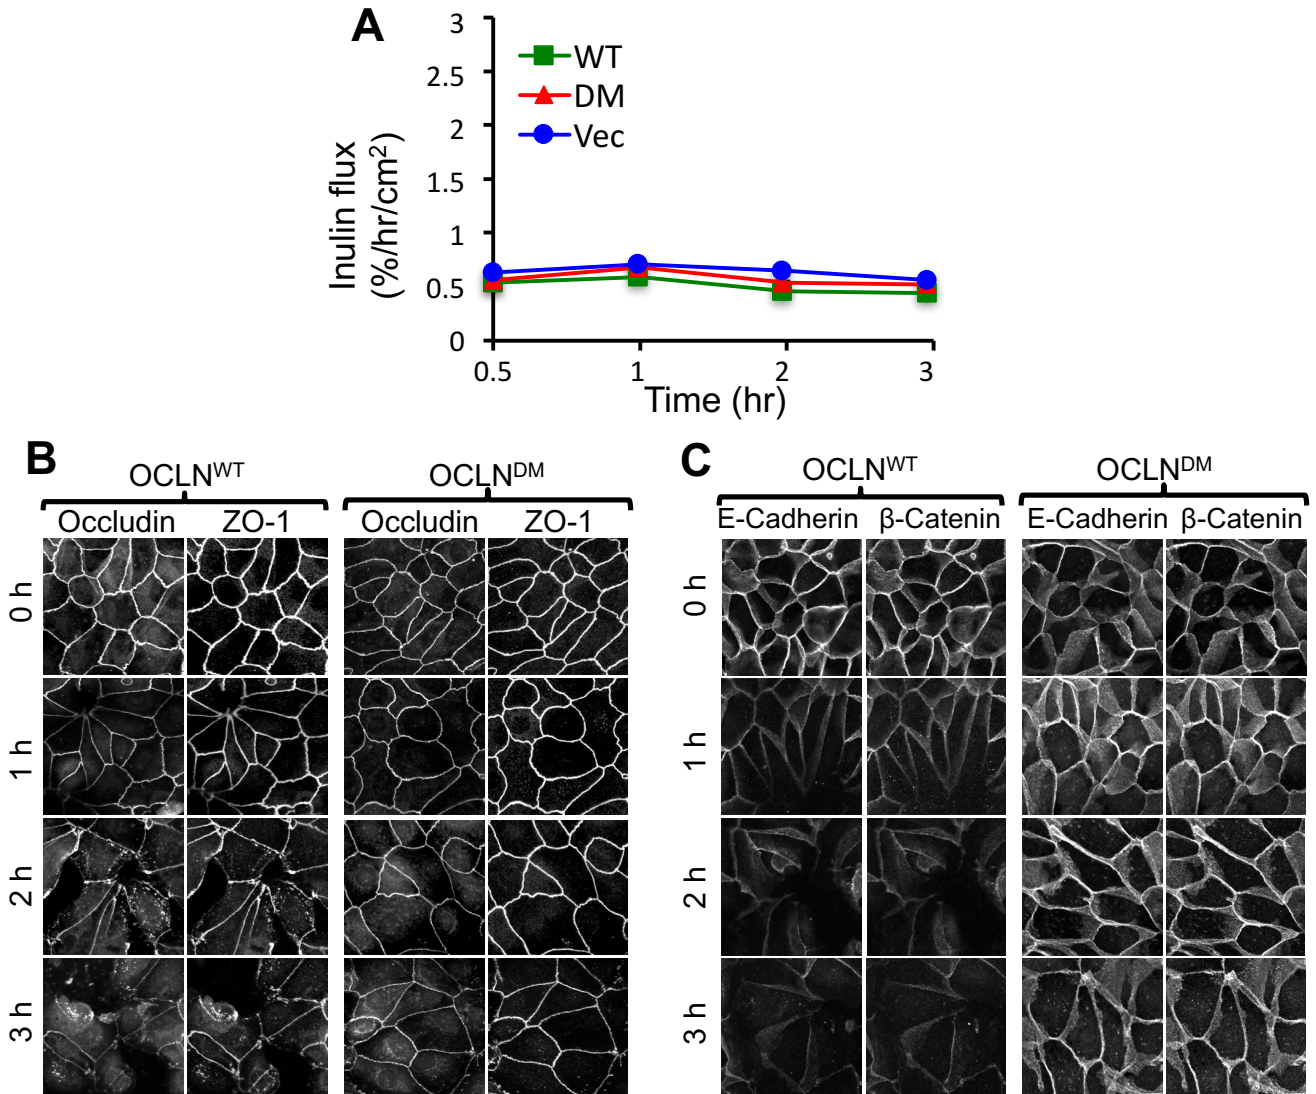

**Fig S6: Deletion of ORM attenuates hydrogen peroxide-induced disruption of AJC.**

**A:** OCLN<sup>WT</sup>, OCLN<sup>DM</sup> and Vec cell monolayers were grown in transwell inserts were exposed to 100  $\mu$ M hydrogen peroxide and inulin flux was measured at various time points; data represent the control values corresponding to data in Fig. 4D. **B & C:** Cell monolayers were treated with hydrogen peroxide for varying times. Fixed cell monolayers were stained for EGFP-occludin/ZO-1 (B) or E-cadherin/ $\beta$ -catenin (C).

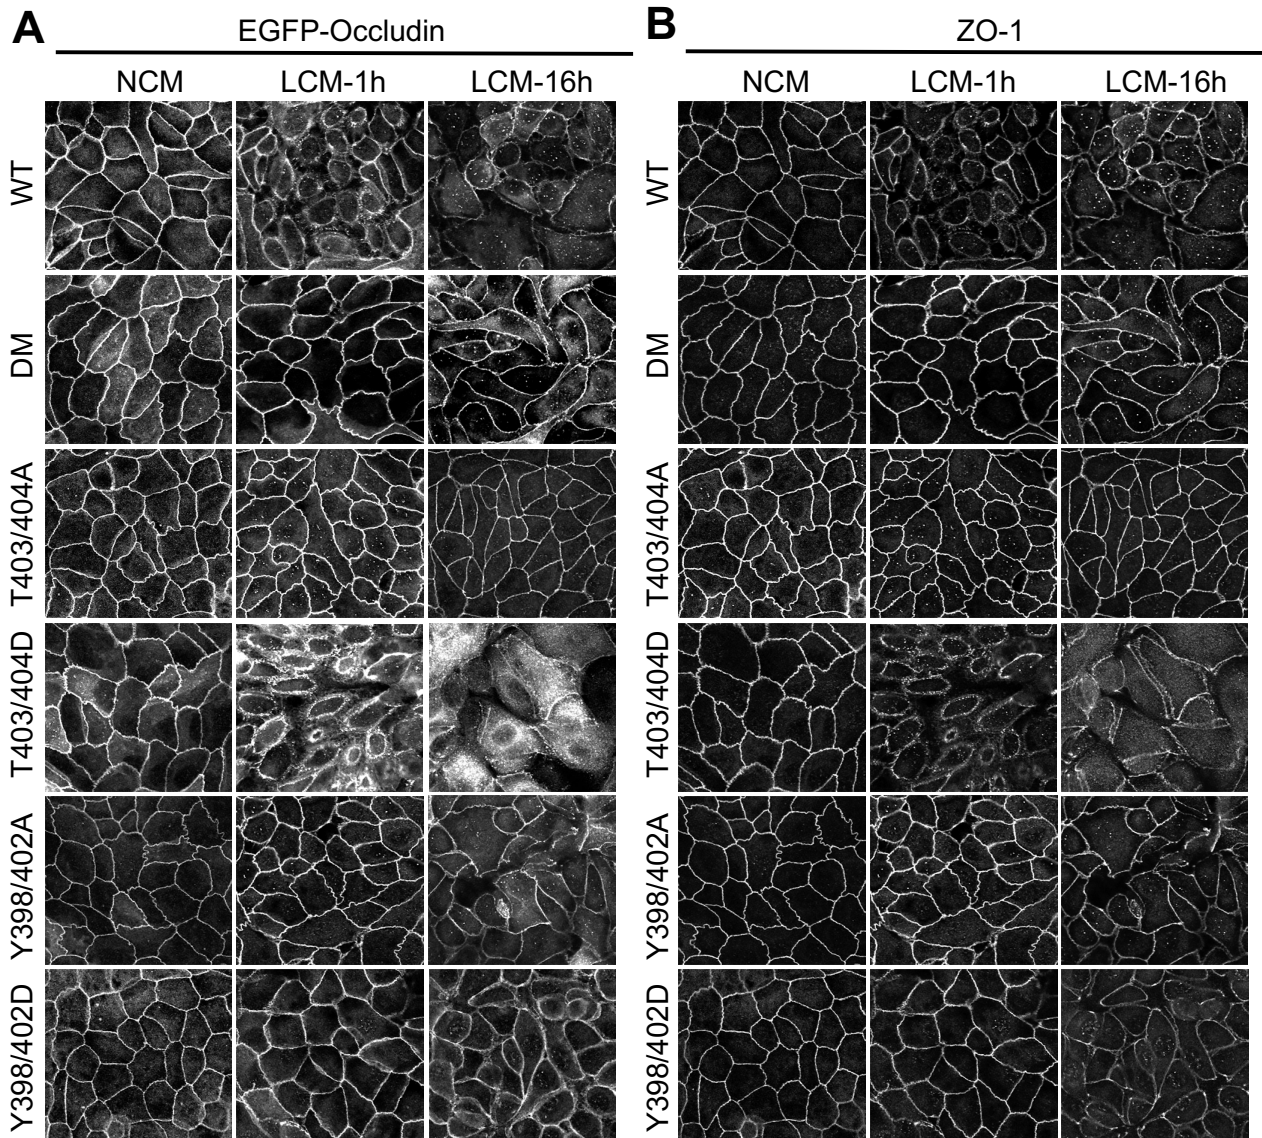

**Figure S7: Mutation of phosphorylation sites in ORM alters  $\text{Ca}^{2+}$  depletion-induced redistribution of TJ proteins.** OCLN<sup>WT</sup>, OCLN<sup>DM</sup>, OCLN<sup>T403/404A</sup>, OCLN<sup>T403/404D</sup>, OCLN<sup>Y398/402A</sup> and OCLN<sup>Y398/402D</sup> cell monolayers were incubated with NCM or LCM for varying times. Fixed cell monolayers were stained for EGFP-Occludin (A) and ZO-1 (B) by immunofluorescence method.



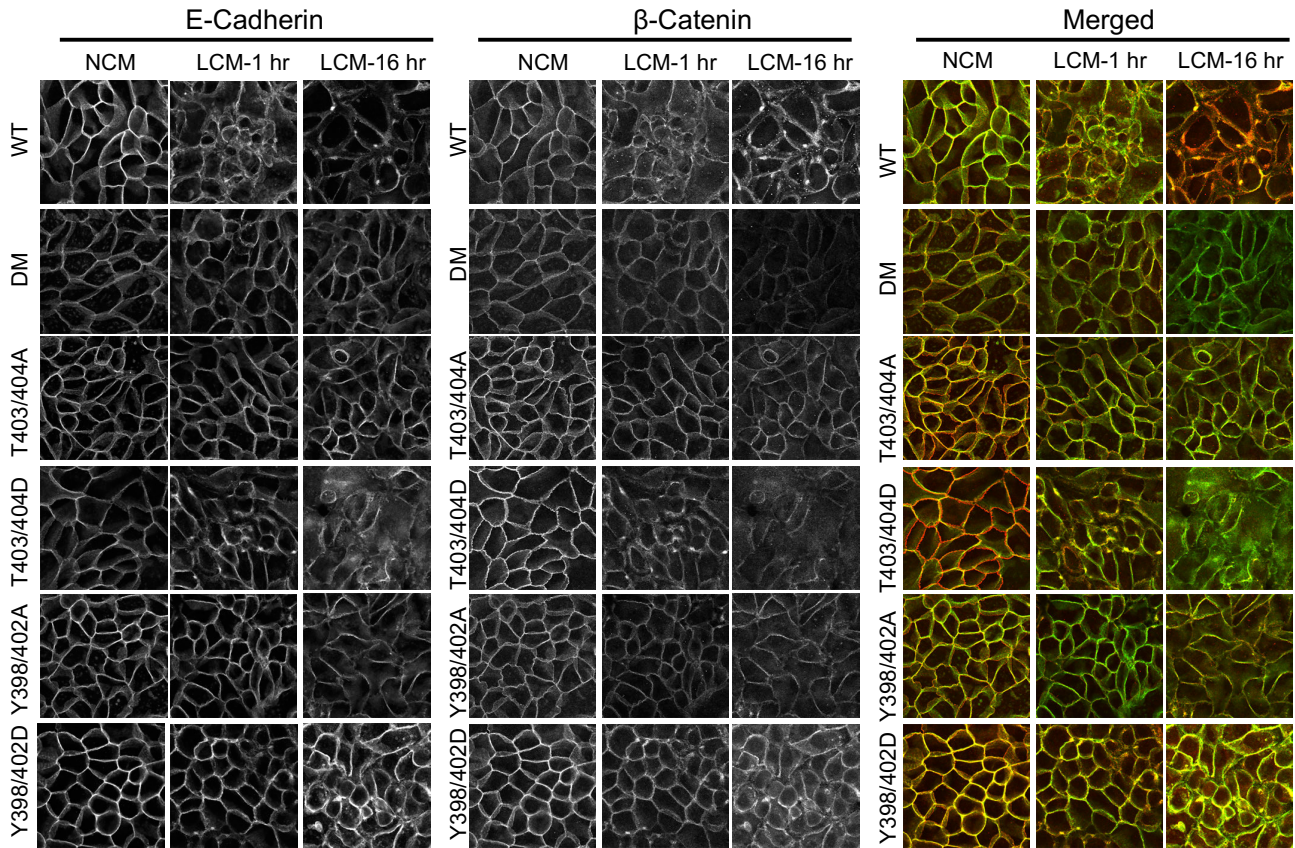

**Figure S8: Mutation of phosphorylation sites in ORM alters  $\text{Ca}^{2+}$  depletion-induced redistribution of AJ proteins.** OCLN<sup>WT</sup>, OCLN<sup>DM</sup>, OCLN<sup>T403/404A</sup>, OCLN<sup>T403/404D</sup>, OCLN<sup>Y398/402A</sup> and OCLN<sup>Y398/402D</sup> cell monolayers were incubated with NCM or LCM for varying times. Fixed cell monolayers were co-stained for E-Cadherin (green) and β-Catenin (red) by immunofluorescence method.

**Table S1:** Primers for shRNA constructs.

Top strand 1:

5'-GATCCCGTATGTCAGACCTTATAACGTTGATATCCGCGTTATAAGGTCTGA  
CATATTTTTTCCAAA-3'

Bottom strand 1:

5'-AGCTTTTGGAAAAAATATGTCAGACCTTATAACGCGGA TATCAACGTTATA  
AGGTCTGACATACGG-3'

Top strand 2:

5'-GATCCCGTATGCTACCACCC ATTAAGTTGATATCCGCTTAATGGGTGGTAGC  
ATATTTTTTCCAAA-3'

Bottom strand 2:

5'-AGCTTTTGGAAAAAATATGCTACCACCCATTAAGCGGATATCAACTTAATGGG  
TGGT AGCATACGG-3'

**Table S2:** Details of antibodies used in this article.

| Antibody                                | Vendor            | Cat#                     | Clone # | Source            | Dilution For Immunofluorescence | Dilution for Western |
|-----------------------------------------|-------------------|--------------------------|---------|-------------------|---------------------------------|----------------------|
| Anti- $\beta$ -Catenin                  | ThermoFisher Sci. | 6734<br>(Lot 2759753)    |         | Rabbit polyclonal | 1-300                           |                      |
| Anti-E-cadherin                         | BD Biosciences    | 610182<br>(Lot 49277)    | 36      | Mouse monoclonal  | 1-500                           |                      |
| Anti-Claudin 2                          | ThermoFisher Sci. | 325600<br>(Lot QF215342) | 12H12   | Mouse monoclonal  | 1-100                           | 1-1000               |
| Anti-Occludin                           | ThermoFisher Sci. | 331500<br>(Lot RG230928) | OC3F10  | Mouse monoclonal  | 1-100                           | 1-1000               |
| Anti-ZO-1                               | ThermoFisher Sci. | 617300<br>(Lot 1575558A) |         | Rabbit polyclonal | 1-100                           | 1-1000               |
| Anti-EGFP                               | ThermoFisher Sci. | 632381<br>(Lot A5033481) | JL8     | Mouse monoclonal  | 1-100                           |                      |
| Anti- $\beta$ -Tubulin                  | ThermoFisher Sci. | FCMAB321F                | AA2     | Mouse monoclonal  | 1-100                           |                      |
| Anti-pMLC                               | ThermoFisher Sci. | 72013<br>(Lot 3)         |         | Mouse monoclonal  | 1-100                           |                      |
| HRP-conjugated anti-mouse IgG           | ThermoFisher Sci. | AA4416                   |         | Goat polyclonal   |                                 | 1-1000               |
| HRP-conjugated anti-rabbit IgG          | Upstate Biotech   | 12-348                   |         | Goat polyclonal   |                                 | 1-1000               |
| Cy3-conjugated anti-rabbit IgG          | Sigma-Aldrich     | C2306<br>(Lot SLBQ0938V) |         | Goat polyclonal   | 1-100                           |                      |
| AlexaFluor488-conjugated anti-mouse IgG | Life technology   | A11029<br>(Lot 1789729)  |         | Goat polyclonal   | 1-100                           |                      |
